# Supplementary material for: Diagnostic Accuracy of Global Pharma Health Fund Minilab™ in Assessing Pharmacopoeial Quality of Antimicrobials
Source: PubMed Central journal article supplement (PMC5928700; doi:10.4269/ajtmh.17-0289), 2017-11-06
Supplement: tpmd170289.SD1.pdf [file tpmd170289.SD1.pdf]

SUPPLEMENTAL TABLE 1  
Studies on surveillance of poor-quality medicines using the GPHF Minilab™

| Reference (Year)                       | Country                                            | Study period | Sample size | Category of drug sampled                                                                                                                                                                                                                                                              | Sampling/testing strategies                                                                                                                                                                                                                                                                                                     | Detection method                                                                      | Results (including diagnostic accuracy)                                                                                                                                                                                                                                                                           | Characteristics of falsified/substandard drug |
|----------------------------------------|----------------------------------------------------|--------------|-------------|---------------------------------------------------------------------------------------------------------------------------------------------------------------------------------------------------------------------------------------------------------------------------------------|---------------------------------------------------------------------------------------------------------------------------------------------------------------------------------------------------------------------------------------------------------------------------------------------------------------------------------|---------------------------------------------------------------------------------------|-------------------------------------------------------------------------------------------------------------------------------------------------------------------------------------------------------------------------------------------------------------------------------------------------------------------|-----------------------------------------------|
| Visser et al. (2015) <sup>9</sup>      | Gabon                                              | 2014–2015    | 432         | 16 kinds of anti-malarial                                                                                                                                                                                                                                                             | Pseudo-patients collected drugs from randomly selected pharmacies. All samples were tested by the Minilab, and those that failed were tested by HPLC-UV-PDA.                                                                                                                                                                    | GPHF Minilab (TLC and disintegration tests) and HPLC-UV-PDA                           | Two of 432 samples (0.5%) failed the TLC test, in which one was falsified (no API), and the other was substandard (nearly half the dose) in the HPLC test. One (0.4%) of 266 samples failed the disintegration test. Compared with HPLC, the Sn and Sp of Minilab TLC for these two samples were both 100% (2/2). | No API, low APIs, expired medicines           |
| Vijaykadge et al. (2006) <sup>10</sup> | Thailand                                           | 2003–2004    | 369         | Anti-malarial (artesunate, chloroquine, mefloquine, quinine, sulfadoxine/pyrimethamine, and tetracycline)                                                                                                                                                                             | All registered private drugstores, groceries, government malaria clinics, and government hospitals were visited. Samples were screened by the Minilab TLC and disintegration tests at sentinel site; 10% of passed, 100% of failed and doubtful samples were confirmed by HPLC and disintegration tests at national laboratory. | GPHF Minilab (TLC and disintegration tests) and HPLC                                  | All 369 (100%) samples passed the Minilab TLC test, but 15 (4.1%) of them failed the disintegration test at sentinel site. From further confirmation of 79 samples, two (2.5%) failed the HPLC test, and seven (8.9%) failed the disintegration test at national laboratory.                                      | Low APIs                                      |
| Bate et al. (2009) <sup>11</sup>       | Ghana, India, Kenya, Nigeria, Tanzania, and Uganda | 2008         | 78          | Anti-malarial (amodiaquine, artemether-lumefantrine fixed-dose combination, artemether, artesunate, chloroquine, dihydroartemisinin, mefloquine, and sulfadoxine-pyrimethamine), antibiotics (erythromycin and ciprofloxacin), and antimycobacterial drugs (isoniazid and rifampicin) | Samples were obtained from the manufacturers or from the GPHF. Samples were screened by the Minilab and further tested by Raman spectrometry and NIR spectrometry tests.                                                                                                                                                        | GPHF Minilab (TLC and disintegration tests), Raman spectrometry, and NIR spectrometry | 15%, 13%, 41%, and 47% of tested samples failed TLC, disintegration test, NIR spectrometry, and Raman spectrometry, respectively.                                                                                                                                                                                 | Not specified                                 |

(continued)

SUPPLEMENTAL TABLE 1  
Continued

| Reference (Year)                   | Country                            | Study period             | Sample size | Category of drug sampled                                                                                                                                                                                                                                                                                       | Sampling/testing strategies                                                                                                                                                                                                                                                          | Detection method                                                                      | Results (including diagnostic accuracy)                                                                                                                                                                                                                                                                                                                                                                                            | Characteristics of falsified/ substandard drug |
|------------------------------------|------------------------------------|--------------------------|-------------|----------------------------------------------------------------------------------------------------------------------------------------------------------------------------------------------------------------------------------------------------------------------------------------------------------------|--------------------------------------------------------------------------------------------------------------------------------------------------------------------------------------------------------------------------------------------------------------------------------------|---------------------------------------------------------------------------------------|------------------------------------------------------------------------------------------------------------------------------------------------------------------------------------------------------------------------------------------------------------------------------------------------------------------------------------------------------------------------------------------------------------------------------------|------------------------------------------------|
| Risha et al. (2008) <sup>27</sup>  | Tanzania                           | 2003–2005 (three phases) | 1,257       | Anti-malarial (quinine, artesunate, and sulfadoxine/pyrimethamine preparations), antibiotics (ampicillin, amoxicillin, metronidazole, ciprofloxacin, cotrimoxazole, and erythromycin), and antiretroviral drugs (lamivudine, zidovudine, indinavir, nevirapine, stavudine, didanosine, and their combinations) | Samples collected at key ports of entry and post-marketing surveillance were screened by the Minitab, and those that failed the screening tests or needed further dissolution testing were tested by full pharmacopoeial monograph testing.                                          | GPHF Minitab (TLC and disintegration tests) and full pharmacopoeial monograph testing | Five of 1,257 (0.3%) failed the Minitab tests (all counterfeit). 46 of 1,257 (3.7%) samples failed the pharmacopoeial monograph tests (substandard).                                                                                                                                                                                                                                                                               | Counterfeit and substandard                    |
| Lalani et al. (2015) <sup>12</sup> | Afghanistan                        | 2009                     | 7,740       | Anti-malarial (chloroquine, sulfadoxine/pyrimethamine, artesunate, artemether, quinine, and primaquine)                                                                                                                                                                                                        | Samples were covertly collected from randomly selected pharmacies. One hundred thirty-four samples were screened by the Minitab, of which 40 were tested by HPLC-UV-PDA and dissolution tests.                                                                                       | GPHF Minitab (TLC and disintegration tests), HPLC-UV-PDA, and dissolution test        | All 134 (100%) samples passed visual inspection, 100% of 132 samples passed the Minitab TLC test, 33 (26%) of 126 samples failed the disintegration test. All 40 samples tested by HPLC passed the test, but 12 (32%) of 37 samples failed the dissolution test.                                                                                                                                                                   | Substandard                                    |
| Fadeyi et al. (2015) <sup>13</sup> | Ghana, Nigeria, and United Kingdom | N/A                      | 35          | Amoxicillin and co-trimoxazole                                                                                                                                                                                                                                                                                 | Samples were obtained from drug outlets, including pharmacies, licensed chemical stores, and drug vendors in Ghana, Nigeria, and United Kingdom using a convenience sampling method with an overt approach. All samples were tested by the Minitab, HPLC-PDA, and dissolution tests. | GPHF Minitab (TLC and colorimetric tests), HPLC-UV-PDA, and dissolution test          | 20 (100%), 18 (90%), 19 (95%), and 20 (100%) of 20 amoxicillin samples passed colorimetric, TLC, HPLC, and dissolution tests, respectively. 15 (100%), 13 (86.7%), 1 (6.67%), and 6 (40%) of 15 co-trimoxazole samples passed colorimetric, TLC, HPLC, and dissolution tests, respectively. Compared with HPLC, the Sn and Sp of Minitab TLC were 0% and 89.5% for amoxicillin, and 14% and 100% for co-trimoxazole, respectively. | Low APIs                                       |

(continued)

SUPPLEMENTAL TABLE 1  
Continued

| Reference (year)                    | Country           | Study period | Sample size | Category of drug sampled                                                                                                                                                                                                                                                                                     | Sampling/testing strategies                                                                                                                                                                                                                                                                                       | Detection method                                                                                      | Results (including diagnostic accuracy)                                                                                                                                                                                                                                                       | Characteristics of falsified/substandard drug             |
|-------------------------------------|-------------------|--------------|-------------|--------------------------------------------------------------------------------------------------------------------------------------------------------------------------------------------------------------------------------------------------------------------------------------------------------------|-------------------------------------------------------------------------------------------------------------------------------------------------------------------------------------------------------------------------------------------------------------------------------------------------------------------|-------------------------------------------------------------------------------------------------------|-----------------------------------------------------------------------------------------------------------------------------------------------------------------------------------------------------------------------------------------------------------------------------------------------|-----------------------------------------------------------|
| Bate and Hess (2010) <sup>14</sup>  | Ghana and Nigeria | 2007–2010    | 339         | Anti-malarial                                                                                                                                                                                                                                                                                                | Samples were purchased covertly from randomly selected pharmacies. 339 samples were tested in the Minitab, of which 300 were further tested by Raman spectrometry                                                                                                                                                 | GPHF Minitab (TLC and disintegration tests), and Raman spectrometry                                   | 32 (9.4%) and 64 (18.9%) of 339 samples failed the visual inspection and the Minitab tests (TLC and disintegration tests), respectively. 29 (9.7%), 55 (18.3%), and 79 (26.3%) of 300 samples failed the visual inspection, the Minitab tests, and Raman spectrometry test, respectively.     | Not specified                                             |
| Khuluza et al. (2017) <sup>15</sup> | Malawi            | 2014–2015    | 155         | Anti-malarial (artemether/lumefantrine, sulfadoxine/pyrimethamine, quinine hydrochloride, artesunate/amodiaquine, quinine sulfate, dihydroartemisinin/piperazine) and antibiotics (phenoxymethylpenicillin, amoxicillin, ciprofloxacin, amoxicillin/clavulanic acid, chloramphenicol, and cefuroxime axetil) | Samples were overtly or covertly collected from randomly selected health facilities. All 155 samples were tested by the Minitab TLC and disintegration tests; 10 samples that failed in the Minitab and a random selection of 46 passed samples (56 in total) were further tested after pharmacopeial monographs. | GPHF Minitab (TLC and disintegration tests) and pharmacopeial monographs (dissolution test and assay) | Of 155 samples, five (3.2%) and four (2.6%) failed in visual inspection and the Minitab TLC/disintegration tests, respectively. Of 56 samples, 5 (8.9%), 4 (7.1%), and 7 (12.5%) failed in visual inspection, the Minitab TLC/disintegration tests, and dissolution test/assay, respectively. | No API, low or higher APIs, other APIs, expired medicines |

API = active pharmaceutical ingredients; HPLC = high-performance liquid chromatography; HPLC-UV-PDA = high-performance liquid chromatography with ultraviolet photo-diode array detection; NIR = near infrared spectrometry; Sn = sensitivity; Sp = specificity; TLC = thin-layer chromatography.
